# Supplementary material for: High lithium electroactivity of boron-doped hierarchical rutile submicrosphere TiO2
Source: Royal Society of Chemistry journal article supplement (doi:10.1039/c4ta01438c), 2014-01-01
Supplement: c4ta01438c1.pdf [file c4ta01438c1.pdf]

Supplementary Material (ESI) for Journal of Materials Chemistry A

## High Lithium Electroactivity of Boron-doped Hierarchical Rutile Submicrospheres TiO<sub>2</sub>

Huajun Tian, Fengxia Xin, Xiaojian Tan and Weiqiang Han\*

Ningbo Institute of Materials Technology & Engineering, Chinese Academy of Sciences,  
No. 1219 Zhongguan West Road, Zhenhai District, Ningbo, Zhejiang 315201 P.R.China.

\* Corresponding author: Weiqiang Han, E-mail: [hanweiqiang@nimte.ac.cn](mailto:hanweiqiang@nimte.ac.cn)

### Supplementary Figure & Table:

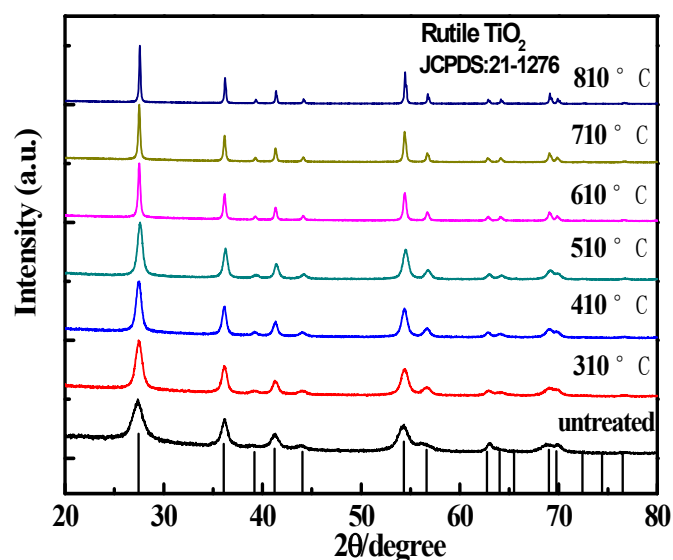

**Figure S1. XRD patterns of the rutile samples prepared for different calcination temperature.**

When the TiCl<sub>4</sub> was added dropwise into the deionized water continuously, the following reactions would occur:

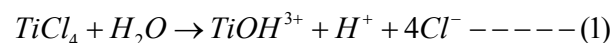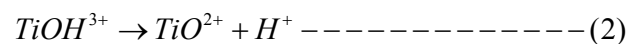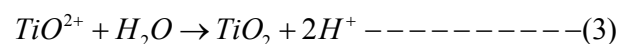

In addition,

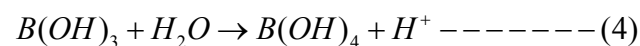

Obviously, the addition of boric acid increases the acidity of the reaction solution. Cheng et al. indicated that increasing the acidity in reaction medium favored of the formation for rutile type

TiO<sub>2</sub>. [1] Chen et al. also found that The doping of boron could efficiently inhibit the grain growth and facilitate the anatase-to-rutile transformation prior to the formation of diboron trioxide phase. [2] Therefore, the samples prepared by the facial method could facilitate the formation of rutile type boron-doped TiO<sub>2</sub>. This is in agreement with results of the XRD patterns.

Alternatively, during the aging of TiCl<sub>4</sub> aqueous sol, the complex of [Ti(OH)<sub>n</sub>Cl<sub>m</sub>]<sup>2-</sup> (n+m=6) would form. [1] Yoon et al. also successfully synthesized hollow core-shell mesoporous TiO<sub>2</sub> spheres by a hydrothermal reaction without surfactant, followed by calcination at 500 °C. It was pointed out that, TiCl<sub>4</sub> formed a complex [Ti(OH)<sub>n</sub>Cl<sub>m</sub>]<sup>2-</sup> (n+m=6) in the hydrothermal process, which on hydrolysis produced TiO<sub>2</sub> embryos that acted as seed for the growth of TiO<sub>2</sub>. The linkage between the [Ti(OH)<sub>4</sub>Cl<sub>2</sub>]<sup>2-</sup> complex and TiO<sub>2</sub> embryos takes place by a dehydration reaction. As a result, the connection of TiO<sub>2</sub> nanoparticles and/or formation of mesopores occur in the TiO<sub>2</sub> samples. [3]

[1] Humin Cheng, Jiming Ma, Zhenguo Zhao, and Limin Qi. *Chem. Mater.* 1995, 7, 663-671

[2] Daimei Chen, Dong Yang, Qun Wang, and Zhongyi Jiang, *Ind. Eng. Chem. Res.* 2006, 45, 4110-4116

[3] Sukeun Yoon and Arumugam Manthiram. *J. Phys. Chem. C* 2011, 115, 9410–9416

Table S1 Crystallite and particle sizes obtained from XRD results for TiO<sub>2</sub> particles calcined at various temperatures

| Calcinated temp., °C | Crystal phase | Crystallite size, nm |
|----------------------|---------------|----------------------|
| untreated            | Rutile        | 8.7                  |
| 310                  | Rutile        | 11.1                 |
| 410                  | Rutile        | 14.5                 |
| 510                  | Rutile        | 15.1                 |
| 610                  | Rutile        | 36.8                 |
| 710                  | Rutile        | 44.5                 |
| 810                  | Rutile        | 86.8                 |

Their average crystallite sizes were calculated from the broadening of the (110) XRD peak of the rutile phase, according to the Scherrer formula:

$$D = \frac{k\lambda}{\beta \cos \theta}$$

where D is the crystal size, λ the X-ray wavelength (1.5418 Å), β the full width at half maximum (FWHM) of the diffraction peak and θ is the diffraction angle. From the FigureS1 and Table S1, at higher calcination temperatures, the crystallites formed are larger in size, which can be attributed to the thermally promoted crystallite growth.
